# Supplementary material
Source: MDPI journal article supplement (https://www.mdpi.com/2073-445X/9/12/472)
Supplement: s1 [file s1]

Supplementary Table S2: Individual-Level Interview Results

| Farm Worker Interview Number | Gender | Main Agri-Food Product in Farm Work <sup>1</sup> | Agri-Food Land System of Main Farm Work               | Agri-Food Product of Secondary Farm Work | Geographic Spaces of (i) Main Farm Work and (ii) Secondary Farm Work | Off- and Non-Farm Employment or Other Main Activity | Location of Residence | Groups or Individual Only in Farm Work | Referred to Role of Agrobiodiverse Foods in Food Security (Yes, No) |
|------------------------------|--------|--------------------------------------------------|-------------------------------------------------------|------------------------------------------|----------------------------------------------------------------------|-----------------------------------------------------|-----------------------|----------------------------------------|---------------------------------------------------------------------|
| 1                            | M      | Vegetables                                       | Conventional Agricultural Export and National Markets | Olives                                   | (i) Peri-urban<br>(ii) Rural                                         | Construction Prior to 2 Years Ago                   | Peri-Urban            | Groups                                 | Yes                                                                 |
| 2                            | M      | Asparagus and Garlic                             | Conventional Agricultural Export and National Markets | Tobacco                                  | (i) Peri-Urban<br>(ii) Peri-Urban                                    | Informal Farm Sales (own production on rented land) | Peri-Urban            | Groups                                 | Yes                                                                 |
| 3                            | M      | Asparagus and Garlic                             | Conventional Agricultural Export and National Markets | Olives                                   | (i) Peri-urban<br>(ii) Rural                                         | Informal Farm Sales (own production on rented land) | Peri-Urban            | Groups                                 | Yes                                                                 |
| 4                            | M      | Vegetables                                       | Conventional Agricultural Export and National Markets | None                                     | (i) Peri-Urban                                                       | Construction                                        | Peri-Urban            | Groups                                 | Yes                                                                 |
| 5                            | M      | Vegetables                                       | Conventional Agricultural Export and National Markets | Olives                                   | (i) Peri-urban<br>(ii) Rural                                         | None                                                | Peri-Urban            | Groups                                 | Yes                                                                 |
| 6                            | F      | Asparagus, Garlic                                | Protected Designation of Origin (PDO)                 | Green Bean, Squash                       | (i) Peri-urban<br>(ii) Intensive                                     | Care of Elderly (prior to 2 years ago)              | Peri-Urban            | Groups                                 | Yes                                                                 |

<sup>1</sup> "Vegetables" refers to tomato, squash, peppers, green beans, and melons. Asparagus and garlic are referred to separately because of prevalence.

|    |   |                      |                                                               |                                     |                                   |                                                                |            |        |     |
|----|---|----------------------|---------------------------------------------------------------|-------------------------------------|-----------------------------------|----------------------------------------------------------------|------------|--------|-----|
| 7  | M | Asparagus            | Protected Designation of Origin (PDO)                         | None                                | (i) Peri-Urban                    | None                                                           | Peri-Urban | Groups | Yes |
| 8  | M | Asparagus            | Conventional Agricultural Export and National Markets         | Olives, Vegetables, Garlic          | (i) Peri-Urban                    | None                                                           | Peri-Urban | Groups | Yes |
| 9  | M | Asparagus and Garlic | Agricultural Export and Protected Designation of Origin (PDO) | Olives                              | (i) Peri-urban<br>(ii) Rural      | Fishing Prior to 2 Years Ago                                   | Peri-Urban | Groups | Yes |
| 10 | M | Asparagus            | Conventional Agricultural Export and National Markets         | Garlic, Vegetables, Vineyard Grapes | (i) Peri-urban<br>(ii) Intensive  | None Recently; Construction Prior to 2 Years Ago               | Peri-Urban | Groups | Yes |
| 11 | F | Asparagus            | Conventional Agricultural Export and National Markets         | Garlic, Fruit                       | (i) Peri-Urban<br>(ii) Peri-Urban | Bakery Recently (part-time); Elderly Care Prior to 2 Years Ago | Peri-Urban | Groups | Yes |
| 12 | M | Olives               | Conventional Agricultural Export and National Markets         | Informal Sector Retail              | (i) Rural                         | Student Prior to 2 Years Ago                                   | Urban      | Groups | Yes |
| 13 | M | Asparagus and Garlic | Conventional Agricultural Export and National Markets         | Olives                              | (i) Peri-urban<br>(ii) Rural      | None Recently; Construction Prior to 2 Years Ago               | Peri-Urban | Groups | No  |
| 14 | M | Asparagus and Garlic | Conventional Agricultural Export and National Markets         | None                                | (i) Peri-Urban                    | Construction Recently and, also, Prior to 2 Years Ago          | Peri-Urban | Groups | No  |

|    |   |                      |                                                       |        |                                   |                                                     |            |                 |     |
|----|---|----------------------|-------------------------------------------------------|--------|-----------------------------------|-----------------------------------------------------|------------|-----------------|-----|
| 15 | M | Asparagus and Garlic | Conventional Agricultural Export and National Markets | Olives | (i) Peri-urban<br>(ii) Rural      | None Recently;<br>Construction Prior to 2 Years Ago | Peri-Urban | Groups          | No  |
| 16 | M | Asparagus and Garlic | Conventional Agricultural Export and National Markets | Olives | (i) Peri-urban<br>(ii) Rural      | None Recently;<br>Construction Prior to 2 Years Ago | Peri-Urban | Groups          | Yes |
| 17 | M | Livestock            | National Specialized Markets                          | Dairy  | (i) Peri-Urban<br>(ii) Peri-Urban | None                                                | Peri-Urban | Individual Only | Yes |
| 18 | M | Vegetables and Fruit | Systemes Agroalimentaires Localisés (SYAL)            | None   | (i) Peri-Urban                    | None Recently;<br>Construction Prior to 2 Years Ago | Urban      | Individual Only | Yes |
| 19 | M | Vegetables and Fruit | Systemes Agroalimentaires Localisés (SYAL)            | None   | (i) Peri-Urban                    | None Recently;<br>Construction Prior to 2 Years Ago | Urban      | Individual Only | Yes |
| 20 | M | Vegetables           | National Markets                                      | None   | (i) Peri-Urban                    | None                                                | Peri-Urban | Individual Only | Yes |
| 21 | M | Vegetables           | National Markets                                      | None   | (i) Peri-Urban                    | None                                                | Peri-Urban | Individual Only | No  |
| 22 | M | Vegetables           | National Markets                                      | None   | (i) Peri-Urban                    | None                                                | Peri-Urban | Individual Only | No  |
| 23 | M | Vegetables           | Systemes Agroalimentaires Localisés (SYAL)            | None   | (i) Peri-Urban                    | Student                                             | Peri-Urban | Individual Only | Yes |
