# Supplementary material
Source: MDPI journal article supplement (https://www.mdpi.com/2073-445X/9/12/472)
Supplement: s1 [file s1]

Supplementary Table S1. Interview Information

| Number of Interview | Main Region of Agri-Food Work | Age | Gender | Home Country | Year of First Arrival in Spain | Current Primary Occupation                  |
|---------------------|-------------------------------|-----|--------|--------------|--------------------------------|---------------------------------------------|
| 1                   | Granada                       | 25  | M      | Senegal      | 2017                           | Farm Work and Street Vending                |
| 2                   | Granada                       | 19  | M      | Bolivia      | 2018                           | Farm Work                                   |
| 3                   | Madrid                        | 52  | M      | Mauritania   | 1995                           | Farm Work                                   |
| 4                   | Granada                       | 47  | F      | Chile        | 2004                           | Agricultural Product Processing and Packing |
| 5                   | Granada                       | 33  | M      | Bolivia      | 2004                           | Farm Work                                   |
| 6                   | Granada                       | 55  | M      | Morocco      | 2010                           | Farm Work                                   |
| 7                   | Madrid                        | 21  | M      | Morocco      | 2017                           | Farm Work                                   |
| 8                   | Madrid                        | 35  | M      | Morocco      | 2017                           | Farm Work                                   |
| 9                   | Madrid                        | 47  | M      | Spain        | NA                             | Farm Administrator                          |
| 10                  | Granada                       | 38  | M      | Morocco      | 1999                           | Farm Work                                   |
| 11                  | Granada                       | 50  | M      | Morocco      | 2009                           | Farm Work                                   |
| 12                  | Madrid                        | 26  | F      | Spain        | NA                             | Farmer                                      |
| 13                  | Madrid                        | 45  | M      | Ecuador      | 2002                           | Farm Work                                   |
| 14                  | Granada                       | 46  | M      | Morocco      | 2007                           | Farm Work                                   |
| 15                  | Granada                       | 42  | M      | Mexico       | 1998                           | Agricultural Cooperative Management         |
| 16                  | Granada                       | 34  | M      | Bolivia      | 2002                           | Farm Work                                   |

|    |         |    |   |                    |      |                                             |
|----|---------|----|---|--------------------|------|---------------------------------------------|
| 17 | Granada | 53 | F | Spain              | NA   | Organic Farmer                              |
| 18 | Granada | 29 | F | Dominican Republic | 2011 | Agricultural Product Processing and Packing |
| 19 | Granada | 40 | F | Spain              | NA   | Organic Farmer                              |
| 20 | Madrid  | 19 | M | Morocco            | 2018 | Farm Work                                   |
| 21 | Granada | 47 | M | Morocco            | 2001 | Farm Work                                   |
| 22 | Granada | 39 | M | Morocco            | 1999 | Farm Work                                   |
| 23 | Granada | 59 | M | Morocco            | 1992 | Farm Work                                   |
| 24 | Madrid  | 54 | M | Spain              | NA   | Farm Manager                                |
| 25 | Madrid  | 58 | M | Spain              | NA   | Farmer                                      |
| 26 | Granada | 30 | F | Bolivia            | 2007 | Farm Work                                   |
| 27 | Granada | 28 | M | Morocco            | 2009 | Farm Work                                   |
| 28 | Granada | 44 | M | Spain              | NA   | Cooperative Administrator                   |
| 29 | Madrid  | 44 | M | Spain              | NA   | Farm Administrator                          |
| 30 | Granada | 49 | M | Senegal            | 2007 | Farm Work                                   |
| 31 | Granada | 33 | M | Spain              | NA   | Crop-Buyer Intermediary                     |
| 32 | Madrid  | 29 | M | Morocco            | 2019 | Farm Work                                   |
| 33 | Granada | 35 | M | Bolivia            | 2005 | Farm Work                                   |
| 34 | Madrid  | 35 | M | Ecuador            | 2018 | Farm Work                                   |
| 35 | Granada | 33 | F | Bolivia            | 2007 | Farm Work                                   |
