# Supplementary material
Source: MDPI journal article supplement (https://www.mdpi.com/2073-445X/9/12/472)
Supplement: s1 [file s1]

## Guion para la Entrevista, "Uso de la Tierra, Migrantes, y Sistemas Agroalimentarios"

1. **Cuéntenos que trabajos ha hecho en la agricultura y el uso de la tierra durante los últimos 12 meses. ¿Qué faenas concretas le ha tocado hacer en el campo y con qué cultivos ha trabajado?**
2. **¿A lo largo del año como se ubican sus labores para el trabajo en la agricultura?** *(por ejemplo, como una secuencia de lugares)*
3. **Desde que llegó a España ¿qué redes de lugares ó circuitos de este tipo ha realizado? Y en caso de no haber hecho este tipo de circuitos ¿en qué zonas del país ha trabajado para realizar qué tipo de labores?**
4. **¿Quiénes son los otros trabajadores agrarios con los cuales ha trabajado durante este último año?** *(Si son las mismas personas siempre, si son familiares, si son del mismo país, etc...).* **Háblenos en concreto de cómo es grupo en lo que trabaja** *(genero, red social, nacionalidad, tamaño, relaciones de parentesco, quién la organiza y cómo se organiza)*
5. **¿Cómo llegó al lugar donde nos encontramos y porqué si es aplicable decidió quedarse a vivir en un área peri-urbana? ¿Cómo mayormente se desplaza desde su casa al lugar/lugares de trabajo?** *(Incluye dónde vive y si su trabajo en el campo resulta accesible desde su lugar de residencia. Queremos saber si tener residencia cerca, como en ciertos pueblos de la Vega y/o la ciudad de Granada, favorece la realización de trabajos agrícolas en la Vega)*
6. **Pensando en los trabajos y los usos de la tierra que han realizado en los últimos 12 meses ¿cómo han aprendido las formas de trabajar incluyendo pero no necesariamente restringido a las técnicas necesarias para llevarlos a cabo?**
7. **¿Trabajaba en la agricultura anteriormente en su país de origen?** *(antes del último año).* **En caso de respuesta afirmativa ¿dónde tenía su trabajo anterior y en que cultivos y sistemas de producción?** *(Esta respuesta incluye qué nacionalidad tiene y en qué región de su país trabajaba)*
8. **¿Qué empleos ocupan mayoritariamente las mujeres? ¿Ellas también trabajan en la agricultura a veces? En el caso de que hagan otros tipos de trabajos ¿cuáles son y dónde se ubican mayoritariamente éstos trabajos y como se relaciona con el trabajo en la agricultura como componente del modo de vivir de la familia? ¿Cree que es más fácil para las mujeres encontrar trabajo si viven cerca de la ciudad y/o en los lugares en la zona peri-urbana?**
9. **¿Cuéntanos cómo ha conseguido su actual trabajo, las relaciones, y las etapas del proceso? En caso de que no haya informado ya sobre esta cuestión, ¿trabaja siempre en las mismas fincas o va cambiando de explotación?**

- 10. ¿Una parte de lo que produce lo destina al auto-consumo y como relaciona con la seguridad alimentaria? ¿Tiene la posibilidad de plantar algunos productos concretos que desee consumir en casa? En caso afirmativo ¿qué cultiva y cuales son las razones atrás sus decisiones de cultivar? *(incluye racionalidades relacionadas con seguridad alimentaria)***
- 11. ¿Considera que los productos agrícolas que puede llevar a casa para el consumo familiar y la seguridad alimentaria y nutricional son parte de su salario y/o como se ve esta práctica? ¿Existe algún tipo de intercambio de productos que resulte habitual entre los agricultores o vecinos?**
- 12. ¿Cuáles son los aspectos de su trabajo en el campo que más le gusta hacer y cuáles los que menos y cuéntanos de las razones de sus perspectivas?**
